# Supplementary material
Source: PubMed Central journal article supplement (PMC3046312)
Supplement: NIHMS254226-supplement-01.pdf [file NIHMS254226-supplement-01.pdf]

**Supplementary Table A – Environmental exposures**

|                                        | Frequent exacerbator | Non-exacerbators | p-value |
|----------------------------------------|----------------------|------------------|---------|
| Exposure to secondhand smoke (current) | 27.1                 | 24.8             | 0.71    |
| Worked at dusty job $\geq$ 1 yr        | 55.6                 | 52.6             | 0.66    |
| Exposed to fumes at work               | 43.4                 | 39.5             | 0.51    |
| Exposure to environmental smoke <18    | 84.3                 | 79.6             | 0.32    |
| Biomass fuel combustion for heat*      | 9.4                  | 11.8             | 0.48    |

Data are presented as percent. \* Defined as use of wood or coal as a home heating source.

**Supplementary Table B – History of asthma and bronchodilator response**

|                                         | Frequent exacerbator | Non-exacerbators | p-value |
|-----------------------------------------|----------------------|------------------|---------|
| Physician diagnosed asthma (ever)       | 36.5                 | 25.5             | 0.04    |
| Asthma diagnosed before age 18          | 10.9                 | 7.8              | 0.36    |
| Positive bronchodilator response (BDR)* | 11.2                 | 12.7             | 0.74    |
| Absolute change in FEV1 (mL)            | 71.9 (98.4)          | 86.6 (119.2)     | 0.05    |
| % change in FEV1 (from baseline)        | 10.4 (14.2)          | 11.3 (15.2)      | 0.21    |
| Change in FEV1 % predicted              | 2.9 (3.9)            | 3.1 (4.2)        | 0.10    |

Data are presented as percent or mean (SD). \*BDR was considered positive if there was a >12% and >200 mL increase from baseline FEV1 following the administration of albuterol.
